# Supplementary material for: ABI5–FLZ13 module transcriptionally represses growth-related genes to delay seed germination in response to ABA
Source: PubMed Central journal article supplement — Plant Commun. 2023 Jun 9;4(6):100636. doi: 10.1016/j.xplc.2023.100636 (PMC10721476; doi:10.1016/j.xplc.2023.100636), 2023-06-09
Supplement: mmc1.pdf [file mmc1.pdf]

**Plant Communications, Volume 4**

**Supplemental information**

**ABI5–FLZ13 module transcriptionally represses growth-related genes  
to delay seed germination in response to ABA**

**Chao Yang, Xibao Li, Shunquan Chen, Chuanliang Liu, Lianming Yang, Kailin Li, Jun Liao, Xuanang Zheng, Hongbo Li, Yongqing Li, Shaohua Zeng, Xiaohong Zhuang, Pedro L. Rodriguez, Ming Luo, Ying Wang, and Caiji Gao**

1 **ABI5-FLZ13 Module Transcriptionally Represses**  
2 **Growth-related Genes to Delay Seed Germination in Response**  
3 **to ABA**

4 Chao Yang<sup>1,2,\*</sup> Xibao Li<sup>2</sup>, Shunquan Chen<sup>2</sup>, Chuanliang Liu<sup>2</sup>, Lianming Yang<sup>2</sup>, Kailin Li<sup>2</sup>,  
5 Jun Liao<sup>2</sup>, Xuanang Zheng<sup>2</sup>, Hongbo Li<sup>2</sup>, Yongqing Li<sup>1</sup>, Shaohua Zeng<sup>1</sup>, Xiaohong  
6 Zhuang<sup>3</sup>, Pedro L. Rodriguez<sup>4</sup>, Ming Luo<sup>1,\*</sup>, Ying Wang<sup>1,\*</sup> and Caiji Gao<sup>2,\*</sup>

7

8 <sup>1</sup>Key Laboratory of South China Agricultural Plant Molecular Analysis and Genetic  
9 Improvement & Guangdong Provincial Key Laboratory of Applied Botany, South  
10 China Botanical Garden, Chinese Academy of Sciences, Guangzhou, 510650, China

11 <sup>2</sup>Guangdong Provincial Key Laboratory of Biotechnology for Plant Development,  
12 School of Life Sciences, South China Normal University (SCNU), Guangzhou 510631,  
13 China

14 <sup>3</sup>School of Life Sciences, Centre for Cell and Developmental Biology, The Chinese  
15 University of Hong Kong, Shatin, New Territories, Hong Kong, China

16 <sup>4</sup>Instituto de Biología Molecular y Celular de Plantas, Consejo Superior de  
17 Investigaciones Científicas-Universidad Politécnica de Valencia, 46022 Valencia,  
18 Spain

19

20 \* Correspondence: Chao Yang ([chaoyang@scbg.ac.cn](mailto:chaoyang@scbg.ac.cn)), Ming Luo  
21 ([luoming@scbg.ac.cn](mailto:luoming@scbg.ac.cn)), Ying Wang ([yingwang@scib.ac.cn](mailto:yingwang@scib.ac.cn)) , Caiji Gao  
22 ([gaocaiji@m.scnu.edu.cn](mailto:gaocaiji@m.scnu.edu.cn))

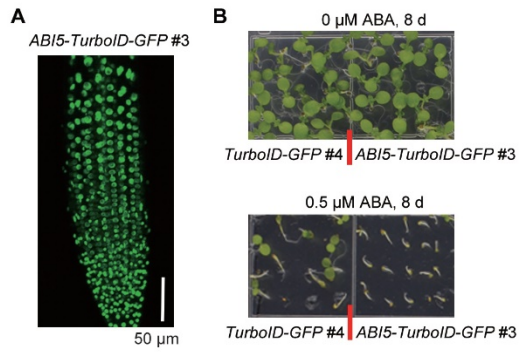

23

24 **Supplemental Figure 1. Characterization of *ABI5-TurboID-GFP* transgenic plants.**

25 A, Confocal image showing the nuclear localization of *ABI5-TurboID-GFP* proteins in root  
 26 cells of 5-day-old seedlings.

27 B, Photographs of seedlings of *TurboID-GFP #4* and *ABI5-TurboID-GFP #3* upon 0 or 0.5  
 28 μM ABA treatment for 8 days.

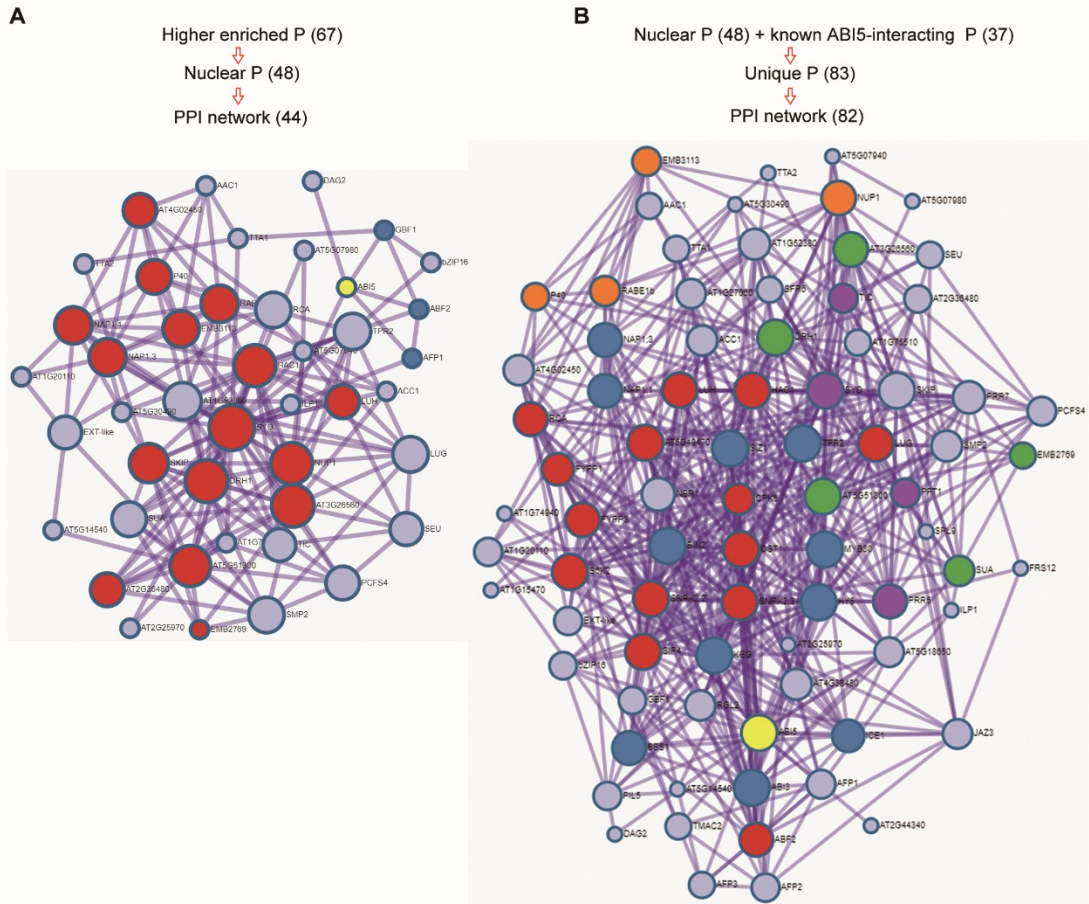

29

30 **Supplemental Figure 2. Metascape visualization of ABI5 interactome networks.** The  
 31 numbers for the checked proteins are shown on the top. The protein-protein interaction  
 32 (PPI) networks were generated on line (<https://metascape.org/>; Zhou et al., 2019). Each  
 33 node represents a protein and each line represents the interlink between two proteins.  
 34 ABI5 is highlighted in yellow. P, Protein.

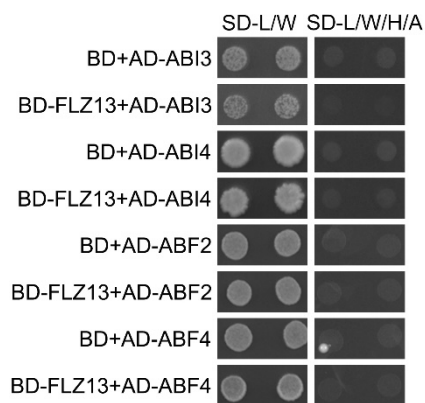

35

36 **Supplemental Figure 3. Y2H analysis of the interaction between FLZ13 and other**  
 37 **key transcription factors involved in ABA signaling.**

38 Protein interaction were determined by growth of the yeast cells co-transformed with  
 39 various combinations of the plasmids on synthetic dropout medium lacking Leu and Trp  
 40 (SD-L/W) and lacking Leu, Trp, His, and adenine (SD-L/W/H/A) as indicated.

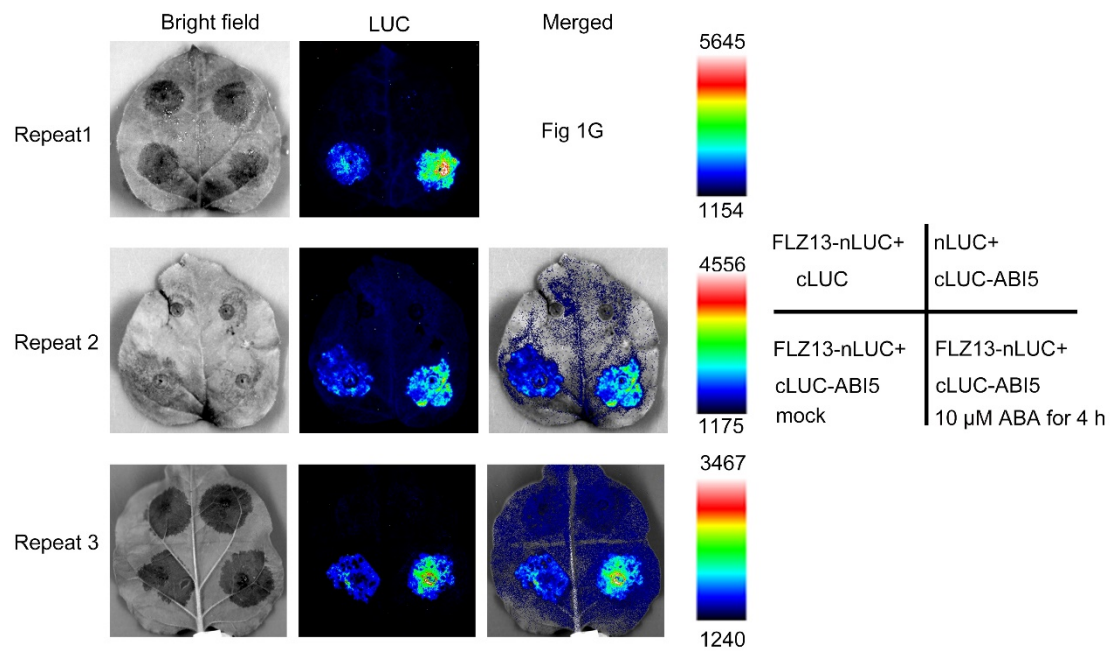

41

42 **Supplemental Figure 4. Three biological replications of LCI experiments showing**  
 43 **that ABA promotes FLZ13-ABI5 interaction.**

44 Three independent experiments of LCI showing the interaction between FLZ13 and ABI5,  
 45 and the promoting effects of ABA on this interaction. *Agrobacteria* harboring FLZ13-nLUC  
 46 was co-infiltrated with *Agrobacteria* harboring cLUC-ABI5 into *N. benthamiana* leaves.  
 47 The FLZ13-nLUC/cLUC and cLUC-ABI5/nLUC pairs were used as negative controls. After  
 48 36 h co-infiltration, leaves were treated with mock and 10  $\mu$ M ABA for 4 h followed by  
 49 luminescence imaging.

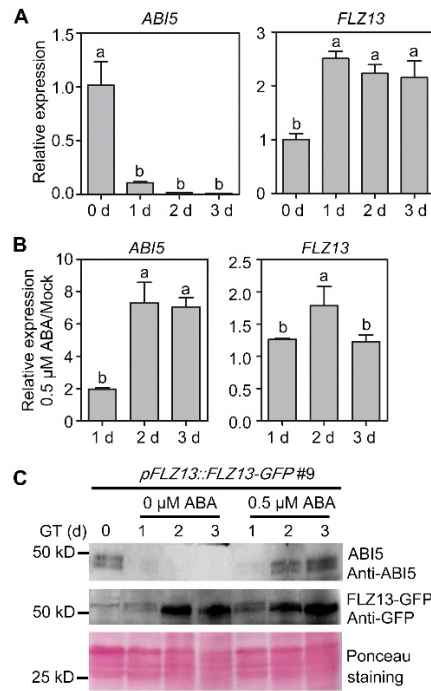

50

51 **Supplemental Figure 5. Expression pattern of *FLZ13* and *ABI5* during seed**  
 52 **germination with or without ABA treatment.**

53 A, Quantitative RT-PCR assay showing the expression of *FLZ13* and *ABI5* in dry and  
 54 germinating seeds. *Actin2* was used as the internal control. Data are presented as mean  $\pm$   
 55 SD ( $n = 3$  technical replicates). The different letters above each bar indicate statistically  
 56 significant differences determined by one-way ANOVA followed by Tukey's multiple  
 57 comparison test ( $P < 0.05$ ). This experiment was repeated twice and similar results were  
 58 obtained.

59 B, Quantitative RT-PCR assay showing the expression of *FLZ13* and *ABI5* in germinating  
 60 seeds in response to ABA treatment. The data are presented as the ratio of ABA to Mock  
 61 treatment. *Actin2* was used as the internal control. Data are presented as mean  $\pm$  SD ( $n =$   
 62 3 technical replicates). The different letters above each bar indicate statistically significant  
 63 differences determined by one-way ANOVA followed by Tukey's multiple comparison test  
 64 ( $P < 0.05$ ). This experiment was repeated twice and similar results were obtained.

65 C, Immunoblot analysis of FLZ13-GFP and ABI5 proteins in response to ABA treatment  
 66 during seed germination. GT: germination time.

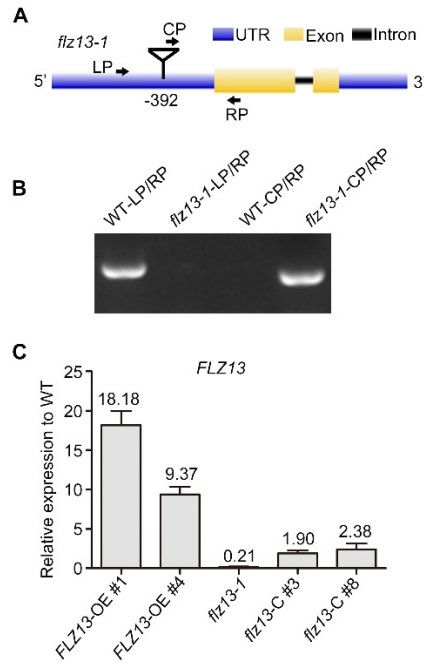

67

68 **Supplemental Figure 6. Characterization of *FLZ13*-related plant materials.**

69 A, Schematic gene structure of *FLZ13*. Triangle indicates the T-DNA insertion site in  
 70 *flz13-1* mutant. Arrows indicate primers used for genotyping of *flz13-1* mutant. LP, left  
 71 primer; CP, common primer; RP, right primer; UTR, untranslated regions.

72 B, Gel electrophoresis of genotyping PCR with WT and *flz13-1* DNA using primers  
 73 indicated in panel A.

74 C, Quantitative RT-PCR showing the gene expression of *FLZ13* in the indicated genetic  
 75 background. Data are presented as mean  $\pm$  SD ( $n = 3$  technical replicates). *Actin2* was  
 76 used as the internal control. The expression level in WT was set as 1.0. The numbers on  
 77 the bars indicate the fold change.



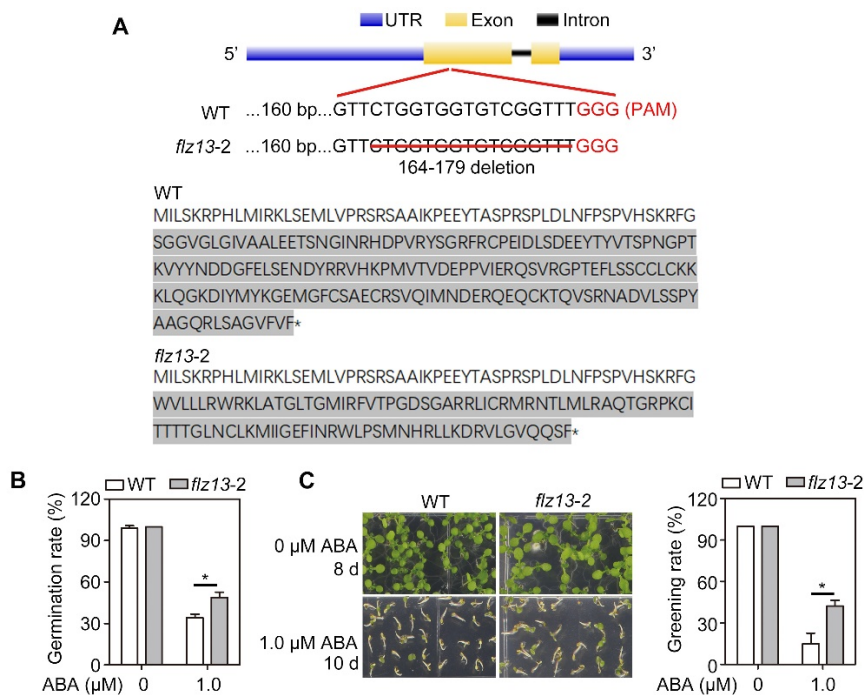

78

79

**Supplemental Figure 7. Characterization of the *flz13-2* mutant.**

80

A, The CRISPR/Cas9 gene editing mutant of *FLZ13*. *flz13-2* harbors a 16-nucleotides deletion which is predicted to encode a truncated protein. UTR, untranslated regions; PAM, protospacer adjacent motif.

83

B, Germination rates of WT and *flz13-2* treated with the indicated concentrations of ABA. The germination rates were recorded 3 d after plating on 1/2 MS medium. Data are presented as mean  $\pm$  SD ( $n = 3$  biological replicates). The asterisk indicates statistically significant differences ( $*P < 0.05$ ) determined by Student's *t*-test.

87

C, Photographs of seedlings (left) and greening rates (right) of WT and *flz13-2* upon 0 or 1.0  $\mu$ M ABA treatment as recorded at the indicated time points. Data is mean  $\pm$  SD ( $n = 3$  biological replicates). The asterisk indicates statistically significant differences ( $*P < 0.05$ ) determined by Student's *t*-test.

90

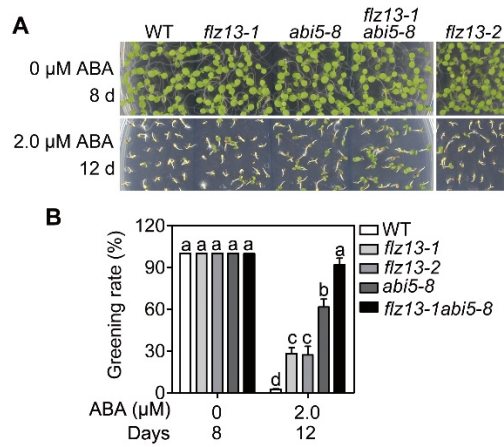

91

92 **Supplemental Figure 8. ABA response of *flz13* and *abi5* mutants.**

93 A, Photographs of seedlings of WT, *flz13-1*, *flz13-2*, *abi5-8*, and *flz13-1 abi5-8* upon 0 or  
94 2.0  $\mu$ M ABA treatment at the indicated time points.

95 B, Cotyledon greening rates of WT, *flz13-1*, *flz13-2*, *abi5-8*, and *flz13-1 abi5-8* upon  
96 various concentration ABA treatment at the indicated time points. Data are presented as  
97 mean  $\pm$  SD ( $n = 3$  biological replicates for 0  $\mu$ M ABA treatment and  $n = 4$  biological  
98 replicates for 2.0  $\mu$ M ABA treatment). The different letters above each bar indicate  
99 statistically significant differences determined by one-way ANOVA followed by Tukey's  
100 multiple comparison test ( $P < 0.05$ ).

101

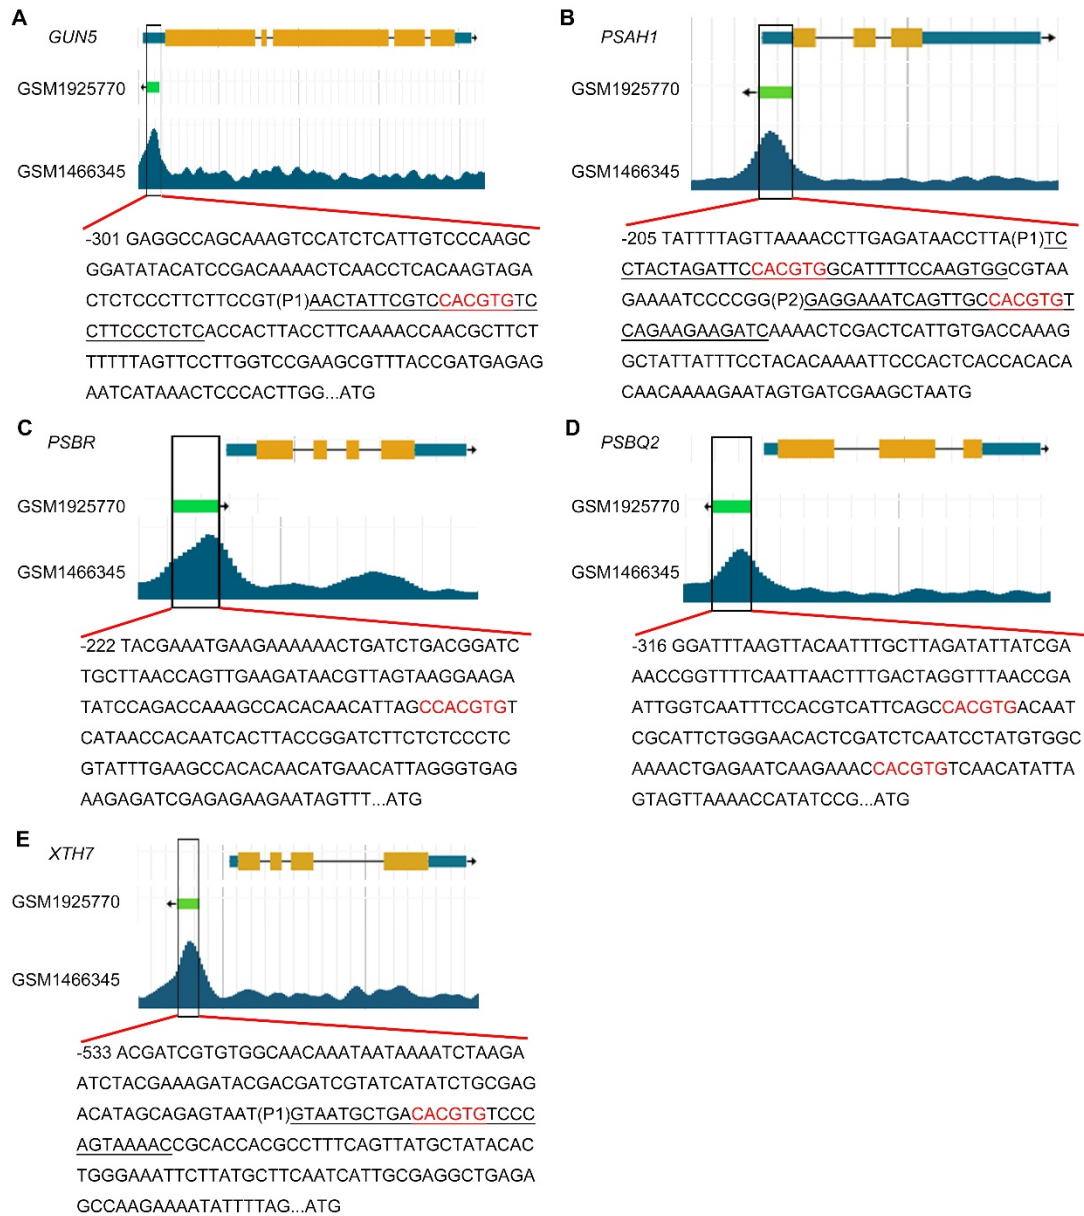

102

103 **Supplemental Figure 9. Five selected target genes of ABI5.**

104 The raw data were downloaded from <http://bioinfo.sibs.ac.cn/plant-regulomics/> (Ran et al.,  
 105 2020) and edited in photoshop. The primers used for EMSA analysis are underlined. The  
 106 sequences of G-box are highlighted in red.

Figure 1C

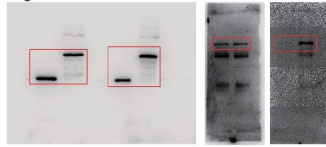

Figure 5F

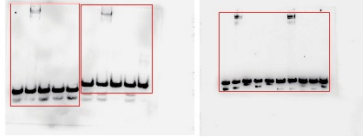

Figure 6C

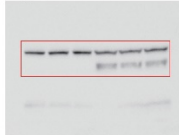

Figure 6D

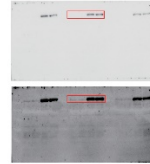

Figure 6E

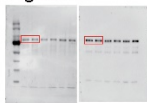

Supplemental Figure 5C

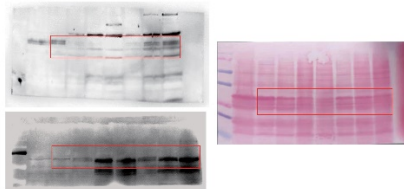

107

108 **Supplemental Figure 10. Original images for Western blots.** The red boxes mark the  
109 sheared regions presented in the corresponding figures.

110 **Supplemental Tables**

111 The following materials are available in the uploaded Excel file.

112 **Supplemental Table 1.** List of the higher enriched proteins in ABI5-TurboID-GFP vs.  
113 TurboID-GFP comparison.

114 **Supplemental Table 2.** List of the 48 nuclear-localized proteins of 67 identified higher  
115 enriched ones in Supplemental Table 1.

116 **Supplemental Table 3.** List of the 37 known ABI5-interacting proteins.

117 **Supplemental Table 4.** DEGs in response to ABA treatment in WT germinating seeds.

118 **Supplemental Table 5.** Expression of known ABA-induced marker genes in the RNA-seq  
119 data.

120 **Supplemental Table 6.** DEGs in ABI5-OE seeds compared to WT upon ABA treatment.

121 **Supplemental Table 7.** DEGs in FLZ13-OE seeds compared to WT upon ABA treatment.

122 **Supplemental Table 8.** Expression of 567 ABA, FLZ13 and ABI5 co-regulated genes.

123 **Supplemental Table 9.** GO enrichment of 496 ABA/ABI5/FLZ13 co-repressed genes.

124 **Supplemental Table 10.** Target genes of ABI5.

125 **Supplemental Table 11.** List of the 35 ABI5 target genes co-regulated by  
126 ABA/ABI5/FLZ13.

127 **Supplemental Table 12.** Expression of the 500 ABA/ABI5/FLZ13 synchronously  
128 co-regulated genes in WT, *FLZ13*-OE, and *FLZ13*-OE/*abi5-8* plants upon ABA treatment.

129 **Supplemental Table 13.** Expression of the 500 synchronously ABA/ABI5/FLZ13  
130 co-regulated genes in WT, *ABI5*-OE, and *ABI5*-OE/*flz13-1* plants upon ABA treatment.

131 **Supplemental Table 14.** List of primers used in this study.

132 **Supplemental Table 15.** Original data for bar charts production and statistical analysis.
